# Supplementary material for: Metabolomics Reveals the Alteration of Metabolic Pathway by Alpha-Melanocyte-Stimulating Hormone in B16F10 Melanoma Cells
Source: PubMed Central journal article supplement (PMC7436294; doi:10.3390/molecules25153384), 2020-07-26
Supplement: molecules-25-03384-s001.pdf [file molecules-25-03384-s001.pdf]

## Supplementary Materials

# Metabolomics Reveals the Alteration of Metabolic Pathway by Alpha-Melanocyte-Stimulating Hormone in B16F10 Melanoma Cells

Seung-Ho Seo <sup>1,†</sup>, Jae Kwon Jo <sup>1,†</sup>, Eun-Ju Kim <sup>1</sup>, Seong-Eun Park <sup>1</sup>, Seo Yeon Shin <sup>2</sup>, Kyung Mok Park <sup>2,\*</sup> and Hong-Seok Son <sup>1,\*</sup>

<sup>1</sup> School of Korean Medicine, Dongshin University, Naju, Jeonnam 58245, Republic of Korea

<sup>2</sup> Department of Pharmaceutical Engineering, Dongshin University, Naju, Jeonnam 58245, Republic of Korea

\* Correspondence: parkkm@dsu.ac.kr (K.M.P.), hsson@dsu.ac.kr (H.-S.S.); Tel.: +82-32-551-3629 (K.M.P.), +82-61-330-3513 (H.-S.S.).

† These authors equally contributed to the work.

**Table 1.** Identified metabolites by GC-MS in melanoma cells.

| No. | Metabolites            | Retention time (min) | Target Mass | HMDB <sup>1)</sup>           | PubChem <sup>2)</sup>    | KEGG <sup>3)</sup>     |
|-----|------------------------|----------------------|-------------|------------------------------|--------------------------|------------------------|
| 1   | Propyleneglycol        | 4.305                | 117         | <a href="#">HMDB0001881</a>  | <a href="#">1030</a>     | <a href="#">C00583</a> |
| 2   | Oxaloacetic acid       | 4.87                 | 174         | <a href="#">HMDB0000223</a>  | <a href="#">970</a>      | <a href="#">C00036</a> |
| 3   | Glycolic acid          | 4.985                | 147         | <a href="#">HMDB0000115</a>  | <a href="#">757</a>      | <a href="#">C03547</a> |
| 4   | Lactic acid            | 4.99                 | 117         | <a href="#">HMDB0000190</a>  | <a href="#">61503</a>    | <a href="#">C00256</a> |
| 5   | Ketovaline             | 6.25                 | 89          | <a href="#">HMDB0000019</a>  | <a href="#">49</a>       | <a href="#">C00141</a> |
| 6   | 2-Aminoisobutyric acid | 6.59                 | 130         | <a href="#">HMDB0001906</a>  | <a href="#">6119</a>     | <a href="#">C03665</a> |
| 7   | 3-Hydroxybutyric acid  | 6.675                | 147         | <a href="#">HMDB0000357</a>  | <a href="#">441</a>      | <a href="#">C01089</a> |
| 8   | Malonic acid           | 6.85                 | 147         | <a href="#">HMDB0000691</a>  | <a href="#">867</a>      | <a href="#">C04025</a> |
| 9   | Leucine                | 7.24                 | 158         | <a href="#">HMDB0000687</a>  | <a href="#">6106</a>     | <a href="#">C00123</a> |
| 10  | Glycerol               | 7.26                 | 147         | <a href="#">HMDB0000131</a>  | <a href="#">753</a>      | <a href="#">C00116</a> |
| 11  | Phosphoric acid        | 7.28                 | 299         | <a href="#">HMDB0001429</a>  | <a href="#">57424078</a> | <a href="#">C00009</a> |
| 12  | Isoleucine             | 7.465                | 158         | <a href="#">HMDB0000172</a>  | <a href="#">6306</a>     | <a href="#">C00407</a> |
| 13  | Proline                | 7.515                | 142         | <a href="#">HMDB0000162</a>  | <a href="#">145742</a>   | <a href="#">C00148</a> |
| 14  | Glycine                | 7.61                 | 174         | <a href="#">HMDB0000123</a>  | <a href="#">750</a>      | <a href="#">C00037</a> |
| 15  | Fumaric acid           | 7.915                | 245         | <a href="#">HMDB0000134</a>  | <a href="#">444972</a>   | <a href="#">C00122</a> |
| 16  | Serine                 | 8.1                  | 204         | <a href="#">HMDB0000187</a>  | <a href="#">5951</a>     | <a href="#">C00065</a> |
| 17  | Alanine                | 8.105                | 100         | <a href="#">HMDB0000161</a>  | <a href="#">5950</a>     | <a href="#">C00041</a> |
| 18  | Threonine              | 8.36                 | 218         | <a href="#">HMDB0000167</a>  | <a href="#">6288</a>     | <a href="#">C00188</a> |
| 19  | 3-Methylglutaric acid  | 8.675                | 147         | <a href="#">HMDB0000752</a>  | <a href="#">12284</a>    | -                      |
| 20  | Malic acid             | 9.24                 | 147         | <a href="#">HMDB0000744</a>  | <a href="#">525</a>      | <a href="#">C03668</a> |
| 21  | Acetylsalicylic acid   | 9.475                | 267         | <a href="#">HMDB0001879</a>  | <a href="#">2244</a>     | <a href="#">C01405</a> |
| 22  | Aspartic acid          | 9.515                | 232         | <a href="#">HMDB0000191</a>  | <a href="#">5960</a>     | <a href="#">C00049</a> |
| 23  | Methionine             | 9.53                 | 176         | <a href="#">HMDB0000696</a>  | <a href="#">6137</a>     | <a href="#">C00073</a> |
| 24  | Pyroglutamic acid      | 9.58                 | 156         | <a href="#">HMDB0000267</a>  | <a href="#">7405</a>     | <a href="#">C01879</a> |
| 25  | Creatinine             | 9.88                 | 115         | <a href="#">HMDB0000562</a>  | <a href="#">588</a>      | <a href="#">C00791</a> |
| 26  | Hypotaurine            | 10.22                | 188         | <a href="#">HMDB0000965</a>  | <a href="#">107812</a>   | <a href="#">C00519</a> |
| 27  | Glutamic acid          | 10.305               | 246         | <a href="#">HMDB0000148</a>  | <a href="#">33032</a>    | <a href="#">C00025</a> |
| 28  | Phenylalanine          | 10.43                | 218         | <a href="#">HMDB0000159</a>  | <a href="#">6140</a>     | <a href="#">C00079</a> |
| 29  | 5-Aminovaleric acid    | 10.485               | 174         | <a href="#">HMDB0003355</a>  | <a href="#">138</a>      | <a href="#">C00431</a> |
| 30  | Taurine                | 10.78                | 326         | <a href="#">HMDB0000251</a>  | <a href="#">1123</a>     | <a href="#">C00245</a> |
| 31  | Ribose                 | 10.835               | 103         | <a href="#">HMDB0000283</a>  | <a href="#">5779</a>     | <a href="#">C00121</a> |
| 32  | N-Formyl-L-Methionine  | 10.96                | 85          | <a href="#">HMDB0001015</a>  | <a href="#">6995182</a>  | <a href="#">C03145</a> |
| 33  | Glutamine              | 11.49                | 156         | <a href="#">HMDB0000641</a>  | <a href="#">5961</a>     | <a href="#">C00064</a> |
| 34  | O-Phosphoethanolamine  | 11.605               | 299         | <a href="#">HMDB0000224</a>  | <a href="#">1015</a>     | <a href="#">C00346</a> |
| 35  | Citric acid            | 11.845               | 147         | <a href="#">HMDB0000094</a>  | <a href="#">311</a>      | <a href="#">C00158</a> |
| 36  | Adenine                | 12.22                | 264         | <a href="#">HMDB0000034</a>  | <a href="#">190</a>      | <a href="#">C00147</a> |
| 37  | Fructose               | 12.27                | 103         | <a href="#">HMDB0000660</a>  | <a href="#">439709</a>   | <a href="#">C02336</a> |
| 38  | Glucose                | 12.46                | 319         | <a href="#">HMDB0001151</a>  | <a href="#">12285879</a> | <a href="#">C01487</a> |
| 39  | Lysine                 | 12.52                | 174         | <a href="#">HMDB0000182</a>  | <a href="#">5962</a>     | <a href="#">C00047</a> |
| 40  | Tyrosine               | 12.66                | 218         | <a href="#">HMDB0000158</a>  | <a href="#">6057</a>     | <a href="#">C00082</a> |
| 41  | Sorbitol               | 12.68                | 319         | <a href="#">HMDB0000247</a>  | <a href="#">5780</a>     | <a href="#">C00794</a> |
| 42  | Gallic acid            | 12.76                | 281         | <a href="#">HMDB00005807</a> | <a href="#">370</a>      | <a href="#">C01424</a> |
| 43  | Palmitoleic acid       | 13.24                | 117         | <a href="#">HMDB0003229</a>  | <a href="#">5312427</a>  | <a href="#">C08362</a> |
| 44  | N-a-Acetyl-L-Lysine    | 13.48                | 174         | <a href="#">HMDB0000446</a>  | <a href="#">192590</a>   | <a href="#">C12989</a> |
| 45  | Inositol               | 13.735               | 217         | <a href="#">HMDB0000211</a>  | -                        | <a href="#">C00137</a> |
| 46  | Heptadecanoic acid     | 13.845               | 117         | <a href="#">HMDB0002259</a>  | <a href="#">10465</a>    | -                      |
| 47  | Elaidic acid           | 14.305               | 117         | <a href="#">HMDB0000573</a>  | <a href="#">637517</a>   | <a href="#">C01712</a> |
| 48  | Cystathionine          | 14.335               | 218         | <a href="#">HMDB0000099</a>  | <a href="#">439258</a>   | <a href="#">C02291</a> |
| 49  | Tryptophan             | 14.485               | 202         | <a href="#">HMDB0000929</a>  | <a href="#">6305</a>     | <a href="#">C00078</a> |
| 50  | Uridine                | 15.54                | 217         | <a href="#">HMDB0000296</a>  | <a href="#">6029</a>     | <a href="#">C00299</a> |
| 51  | Serotonin              | 15.77                | 174         | <a href="#">HMDB0000259</a>  | <a href="#">5202</a>     | <a href="#">C00780</a> |
| 52  | 5-Methylthioadenosine  | 17.5                 | 236         | <a href="#">HMDB0001173</a>  | <a href="#">439176</a>   | <a href="#">C00170</a> |

<sup>1)</sup> HMDB, Human Metabolome Database; HMDB is a comprehensive, high-quality, freely accessible, online database of small molecule metabolites found in the human body.

<sup>2)</sup> PubChem; PubChem is a database of chemical molecules and their activities against biological assays.

<sup>3)</sup> KEGG; Kyoto Encyclopedia of Genes and Genomes. KEGG is a collection of databases dealing with genomes, biological pathways, diseases, drugs, and chemical substances.

**Table 2.** Significantly changed metabolites in melanoma cells after 48 h of incubation.

| Metabolites           | VIP score | 48 h / 1 h<br>(↑ / ↓) <sup>1)</sup> | <i>p</i> value | <i>q</i> value <sup>2)</sup> | Significance <sup>3)</sup> |
|-----------------------|-----------|-------------------------------------|----------------|------------------------------|----------------------------|
| Glycine               | 1.35      | ↑                                   | 3.56E-06       | 0.006                        | ***                        |
| Xylonic acid          | 1.34      | ↑                                   | 1.01E-08       | 0.001                        | ***                        |
| Inositol              | 1.34      | ↑                                   | 2.00E-05       | 0.010                        | ***                        |
| Phosphoric acid       | 1.34      | ↑                                   | 5.55E-08       | 0.003                        | ***                        |
| Citric acid           | 1.34      | ↑                                   | 4.14E-04       | 0.024                        | ***                        |
| Oxaloacetic acid      | 1.34      | ↑                                   | 1.31E-04       | 0.016                        | ***                        |
| 3-Hydroxybutyric acid | 1.34      | ↑                                   | 1.35E-07       | 0.004                        | ***                        |
| Adenine               | 1.32      | ↑                                   | 1.41E-04       | 0.017                        | ***                        |
| Tryptophan            | 1.31      | ↑                                   | 3.97E-04       | 0.022                        | ***                        |
| Elaidic acid          | 1.31      | ↑                                   | 6.23E-06       | 0.007                        | ***                        |
| Lysine                | 1.30      | ↑                                   | 1.45E-05       | 0.008                        | ***                        |
| Phenylalanine         | 1.29      | ↑                                   | 4.16E-04       | 0.024                        | ***                        |
| Glycolic acid         | 1.29      | ↑                                   | 8.77E-04       | 0.026                        | ***                        |
| Lactic acid           | 1.29      | ↑                                   | 8.81E-04       | 0.028                        | ***                        |
| Anthranilic acid      | 1.27      | ↑                                   | 4.93E-05       | 0.011                        | ***                        |
| Ribose                | 1.27      | ↑                                   | 5.38E-05       | 0.013                        | ***                        |
| Cystathionine         | 1.27      | ↑                                   | 6.34E-05       | 0.014                        | ***                        |
| Methionine            | 1.26      | ↑                                   | 8.10E-05       | 0.015                        | ***                        |
| Taurine               | 1.25      | ↑                                   | 1.43E-04       | 0.018                        | ***                        |
| Alanine               | 1.24      | ↑                                   | 2.40E-04       | 0.019                        | ***                        |
| Threonine             | 1.23      | ↑                                   | 3.22E-03       | 0.036                        | **                         |
| Fructose              | 1.22      | ↑                                   | 3.40E-04       | 0.021                        | ***                        |
| 5-Methylthioadenosine | 1.21      | ↑                                   | 5.69E-04       | 0.025                        | ***                        |
| Creatinine            | 1.19      | ↑                                   | 3.86E-03       | 0.039                        | **                         |
| Isoleucine            | 1.19      | ↑                                   | 4.02E-03       | 0.040                        | **                         |
| Malonic acid          | 1.16      | ↑                                   | 1.60E-03       | 0.029                        | **                         |
| Pyroglutamic acid     | 1.16      | ↑                                   | 6.83E-03       | 0.043                        | **                         |
| Malic acid            | 1.15      | ↓                                   | 1.84E-03       | 0.031                        | **                         |
| Hypotaurine           | 1.12      | ↑                                   | 2.92E-03       | 0.035                        | **                         |
| Gallic acid           | 1.12      | ↑                                   | 3.73E-03       | 0.038                        | **                         |
| Glutamine             | 1.11      | ↓                                   | 1.70E-02       | 0.050                        | *                          |
| Proline               | 1.10      | ↑                                   | 1.62E-02       | 0.049                        | *                          |
| Leucine               | 1.09      | ↑                                   | 1.24E-02       | 0.046                        | *                          |
| Mandelic acid         | 1.09      | ↑                                   | 5.31E-03       | 0.042                        | **                         |
| Glutamic acid         | 1.03      | ↓                                   | 1.11E-02       | 0.044                        | *                          |
| Aspartic acid         | 1.02      | ↓                                   | 1.37E-02       | 0.047                        | *                          |

<sup>1)</sup> The vertical arrows (↓ and ↑) represent a decrease or increase in metabolite levels after incubation (48 hour).

<sup>2)</sup> False discovery rate (FDR); the false discovery rate of 5% was applied to all tests to correct for multiple testing.

<sup>3)</sup> Symbols (\*) indicate significant difference (\*,  $p < 0.05$ ; \*\*,  $p < 0.01$ ; \*\*\*,  $p < 0.001$ ).

**Table 3.** Significantly changed metabolites in melanoma cells treated with  $\alpha$ -MSH after 48 h of incubation.

| Metabolites           | VIP score | 48 h / 1 h<br>( $\uparrow / \downarrow$ ) <sup>1)</sup> | <i>p</i> value | <i>q</i> value <sup>2)</sup> | Significance <sup>3)</sup> |
|-----------------------|-----------|---------------------------------------------------------|----------------|------------------------------|----------------------------|
| Citric acid           | 1.34      | $\uparrow$                                              | 1.22E-10       | 0.001                        | ***                        |
| Inositol              | 1.33      | $\uparrow$                                              | 4.09E-10       | 0.001                        | ***                        |
| Glycine               | 1.33      | $\uparrow$                                              | 5.04E-06       | 0.011                        | ***                        |
| Lactic acid           | 1.33      | $\uparrow$                                              | 2.76E-09       | 0.003                        | ***                        |
| Oxaloacetic acid      | 1.32      | $\uparrow$                                              | 4.70E-08       | 0.006                        | ***                        |
| Glycolic acid         | 1.32      | $\uparrow$                                              | 6.19E-09       | 0.004                        | ***                        |
| Xylonic acid          | 1.31      | $\uparrow$                                              | 1.82E-06       | 0.010                        | ***                        |
| Phosphoric acid       | 1.31      | $\uparrow$                                              | 4.61E-07       | 0.006                        | ***                        |
| Adenine               | 1.31      | $\uparrow$                                              | 2.35E-07       | 0.005                        | ***                        |
| 3-Hydroxybutyric acid | 1.31      | $\uparrow$                                              | 9.04E-05       | 0.018                        | ***                        |
| Glutamine             | 1.31      | $\downarrow$                                            | 6.97E-07       | 0.008                        | ***                        |
| Tryptophan            | 1.31      | $\uparrow$                                              | 7.25E-07       | 0.009                        | ***                        |
| Phenylalanine         | 1.27      | $\uparrow$                                              | 9.40E-04       | 0.031                        | ***                        |
| Fructose              | 1.27      | $\uparrow$                                              | 2.68E-05       | 0.013                        | ***                        |
| Sorbitol              | 1.26      | $\uparrow$                                              | 3.82E-05       | 0.014                        | ***                        |
| Lysine                | 1.25      | $\uparrow$                                              | 5.75E-05       | 0.015                        | ***                        |
| Elaidic acid          | 1.25      | $\uparrow$                                              | 7.68E-05       | 0.016                        | ***                        |
| Pyroglutamic acid     | 1.24      | $\uparrow$                                              | 1.04E-04       | 0.019                        | ***                        |
| Taurine               | 1.24      | $\uparrow$                                              | 1.05E-04       | 0.020                        | ***                        |
| Ribose                | 1.24      | $\uparrow$                                              | 1.12E-04       | 0.021                        | ***                        |
| Alanine               | 1.23      | $\uparrow$                                              | 1.37E-04       | 0.023                        | ***                        |
| Anthranilic acid      | 1.22      | $\uparrow$                                              | 9.73E-04       | 0.033                        | ***                        |
| Methionine            | 1.21      | $\uparrow$                                              | 2.64E-03       | 0.040                        | **                         |
| 5-Methylthioadenosine | 1.21      | $\uparrow$                                              | 2.68E-04       | 0.024                        | ***                        |
| Mandelic acid         | 1.21      | $\uparrow$                                              | 3.27E-04       | 0.025                        | ***                        |
| Creatinine            | 1.20      | $\uparrow$                                              | 5.52E-04       | 0.029                        | ***                        |
| Gallic acid           | 1.20      | $\uparrow$                                              | 4.13E-04       | 0.026                        | ***                        |
| Threonine             | 1.19      | $\uparrow$                                              | 4.71E-04       | 0.028                        | ***                        |
| Glucose               | 1.19      | $\downarrow$                                            | 3.64E-03       | 0.044                        | **                         |
| Glutamic acid         | 1.18      | $\downarrow$                                            | 6.44E-04       | 0.030                        | ***                        |
| Malonic acid          | 1.16      | $\uparrow$                                              | 1.10E-03       | 0.034                        | **                         |
| Isoleucine            | 1.16      | $\uparrow$                                              | 1.15E-03       | 0.035                        | **                         |
| Cystathionine         | 1.14      | $\uparrow$                                              | 1.59E-03       | 0.036                        | **                         |
| Hypotaurine           | 1.14      | $\uparrow$                                              | 1.78E-03       | 0.038                        | **                         |
| Glycolic acid         | 1.13      | $\uparrow$                                              | 6.06E-03       | 0.045                        | **                         |
| Aspartic acid         | 1.11      | $\downarrow$                                            | 2.62E-03       | 0.039                        | **                         |
| Proline               | 1.11      | $\uparrow$                                              | 2.77E-03       | 0.041                        | **                         |
| Leucine               | 1.10      | $\uparrow$                                              | 3.16E-03       | 0.043                        | **                         |
| Fumaric acid          | 1.05      | $\uparrow$                                              | 7.06E-03       | 0.046                        | **                         |
| Malic acid            | 1.05      | $\uparrow$                                              | 7.17E-03       | 0.048                        | **                         |
| Glycerol              | 1.02      | $\uparrow$                                              | 1.04E-02       | 0.049                        | *                          |

<sup>1)</sup> The vertical arrows ( $\downarrow$  and  $\uparrow$ ) represent a decrease or increase in metabolite levels after incubation (48 hour).

<sup>2)</sup> False discovery rate (FDR); the false discovery rate of 5% was applied to all tests to correct for multiple testing.

<sup>3)</sup> Symbols (\*) indicate significant difference (\*,  $p < 0.05$ ; \*\*,  $p < 0.01$ ; \*\*\*,  $p < 0.001$ ).

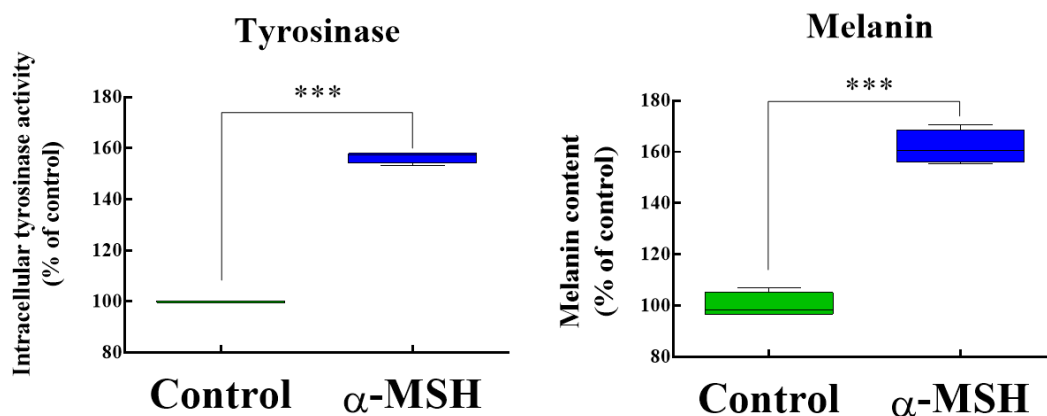

**Figure 1.** Box plots of tyrosinase activity and melanin content. Symbols (\*) indicate significant difference (\*  $p < 0.05$ ; \*\*  $p < 0.01$ ; \*\*\*  $p < 0.001$ ).

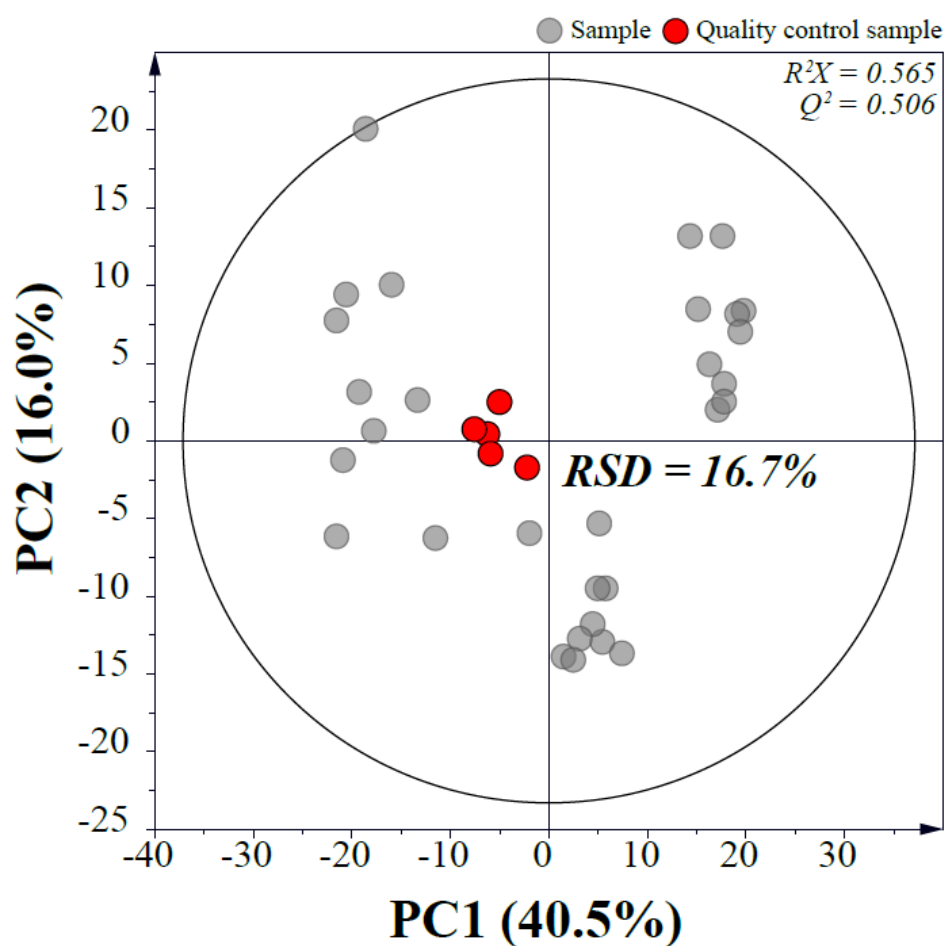

**Figure 2.** PCA score plot derived from GC-MS data of experimental samples (grey) and QC samples (red). QC samples were clustered centrally in the PCA score plot, ensuring the reliability of metabolomics analysis.
